# Supplementary material for: A Common Variant Associated with Dyslexia Reduces Expression of the KIAA0319 Gene
Source: PubMed Central journal article supplement (PMC2653637; doi:10.1371/journal.pgen.1000436), 2009-03-27
Supplement: pgen.1000436.s003.pdf [file pgen.1000436.s003.pdf]

Table S1. Marker-trait association P-values in sample 1 (89 families)

| Marker <sup>1</sup>      | Gene            | Risk Allele <sup>2</sup> | P-Value for Trait <sup>3</sup> |        |           |        |        |        |
|--------------------------|-----------------|--------------------------|--------------------------------|--------|-----------|--------|--------|--------|
|                          |                 |                          | OC-irreg                       | PD     | OC-choice | READ   | SPELL  | PA     |
| rs1419228                | <i>DCDC2</i>    |                          |                                |        |           |        |        |        |
| rs793862                 | <i>DCDC2</i>    |                          |                                |        |           |        |        |        |
| rs793834                 | <i>DCDC2</i>    |                          |                                |        |           |        |        |        |
| rs807701                 | <i>DCDC2</i>    |                          |                                |        |           |        |        |        |
| rs807724                 | <i>DCDC2</i>    |                          |                                |        |           |        |        |        |
| DCDC2_deletion           | <i>DCDC2</i>    | 2                        | 0.0298                         |        |           | 0.0428 |        | 0.0478 |
| rs7765678                | <i>DCDC2</i>    |                          |                                |        |           |        |        |        |
| rs1087266                | <i>DCDC2</i>    |                          |                                |        |           |        |        |        |
| rs4504469                | <i>KIAA0319</i> | 1                        | 0.0227                         |        |           |        |        | 0.0338 |
| rs2179515                | <i>KIAA0319</i> | 1                        | 0.0076                         |        |           |        |        |        |
| rs730860                 | <i>KIAA0319</i> | 2                        | 0.0058                         |        | 0.0042    |        |        |        |
| rs761101                 | <i>KIAA0319</i> | 1                        | 0.0173                         |        |           |        |        |        |
| rs761100                 | <i>KIAA0319</i> | 1                        | 0.008                          |        |           |        |        |        |
| rs2038137                | <i>KIAA0319</i> | 1                        | 0.0262                         |        |           |        |        |        |
| k_pr_del                 | Intergenic      | 1                        | 0.0086                         |        |           |        |        |        |
| <b>SNP24754493</b>       | Intergenic      |                          |                                |        |           |        |        |        |
| <b>rs3756821</b>         | Intergenic      | 2                        |                                | 0.0341 |           |        |        |        |
| rs9467247 <sup>4</sup>   | Intergenic      | 2                        | 0.0001                         |        | 0.0031    | 0.0085 | 0.0194 |        |
| rs1555090                | Intergenic      | 1                        | 0.0094                         |        |           | 0.0803 |        |        |
| rs3212236 <sup>4</sup>   | Intergenic      | 2                        | 0.0002                         |        | 0.0023    | 0.0175 | 0.0491 |        |
| <b>rs13206167</b>        | Intergenic      |                          |                                |        |           |        |        |        |
| <b>rs9461045</b>         | Intergenic      | 2                        | 0.0002                         |        | 0.0049    | 0.013  | 0.0342 |        |
| <b>rs28501680</b>        | Intergenic      |                          |                                |        |           |        |        |        |
| rs2143340 <sup>4,5</sup> | <i>TTRAP</i>    | 2                        | 0.0064                         |        | 0.0052    | 0.0165 |        |        |

<sup>1</sup> Markers new to this study are in bold

<sup>2</sup> 1 = major allele; 2 = minor allele

<sup>3</sup> Only nominally significant marker-trait associations ( $P < 0.05$ ) are shown, and are uncorrected for multiple testing

<sup>4</sup> Re-genotyped in this study, resulting in different P-values than previously reported

<sup>5</sup> Risk haplotype-tagging SNP
