# Supplementary material for: A Common Variant Associated with Dyslexia Reduces Expression of the KIAA0319 Gene
Source: PubMed Central journal article supplement (PMC2653637; doi:10.1371/journal.pgen.1000436), 2009-03-27
Supplement: pgen.1000436.s005.pdf [file pgen.1000436.s005.pdf]

Table S3. Marker-trait association P-values in the entire U.K. set (264 families) – Adapted from Harold et al. [17]

| Marker <sup>1</sup> | Gene            | Risk Allele <sup>2</sup> | P-Value for Trait <sup>3</sup> |        |           |        |        |        |
|---------------------|-----------------|--------------------------|--------------------------------|--------|-----------|--------|--------|--------|
|                     |                 |                          | OC-irreg                       | PD     | OC-choice | READ   | SPELL  | PA     |
| rs1419228           | <i>DCDC2</i>    |                          |                                |        |           |        |        |        |
| rs7762605           | <i>DCDC2</i>    |                          |                                |        |           |        |        |        |
| rs793862            | <i>DCDC2</i>    | 1                        |                                | 0.0424 |           | 0.0396 | 0.0226 |        |
| rs793834            | <i>DCDC2</i>    |                          |                                |        |           |        |        |        |
| rs807701            | <i>DCDC2</i>    |                          |                                |        |           |        |        |        |
| rs807726            | <i>DCDC2</i>    |                          |                                |        |           |        |        |        |
| rs807724            | <i>DCDC2</i>    | 1                        |                                |        |           | 0.0137 | 0.0115 | 0.0387 |
| rs10806987          | <i>DCDC2</i>    |                          |                                |        |           |        |        |        |
| DCDC2_deletion      | <i>DCDC2</i>    |                          |                                |        |           |        |        |        |
| rs7765678           | <i>DCDC2</i>    |                          |                                |        |           |        |        |        |
| rs793704            | <i>DCDC2</i>    |                          |                                |        |           |        |        |        |
| rs1087266           | <i>DCDC2</i>    | 1                        |                                | 0.0257 |           |        |        | 0.0053 |
| rs2817220           | <i>ALDH5A1</i>  | 1                        |                                | 0.0462 |           |        |        | 0.0226 |
| rs2252525           | <i>ALDH5A1</i>  |                          |                                |        |           |        |        |        |
| rs807517            | <i>ALDH5A1</i>  | 1                        |                                |        |           |        |        | 0.0155 |
| rs1054899           | <i>ALDH5A1</i>  | 1                        |                                |        |           |        | 0.0204 |        |
| rs2760184           | Intergenic      |                          |                                |        |           |        |        |        |
| rs807527            | <i>KIAA0319</i> |                          |                                |        |           |        |        |        |
| rs699463            | <i>KIAA0319</i> | 1                        | 0.0412                         |        |           | 0.0358 | 0.0101 | 0.0124 |
| rs807530            | <i>KIAA0319</i> |                          |                                |        |           |        |        |        |
| rs807535            | <i>KIAA0319</i> |                          |                                |        |           |        |        |        |
| rs807540            | <i>KIAA0319</i> |                          |                                |        |           |        |        |        |
| rs807545            | <i>KIAA0319</i> |                          |                                |        |           |        |        |        |
| rs2817191           | <i>KIAA0319</i> |                          |                                |        |           |        |        |        |
| rs807521            | <i>KIAA0319</i> | 1                        |                                |        |           |        |        | 0.0485 |
| rs807525            | <i>KIAA0319</i> |                          |                                |        |           |        |        |        |
| rs807507            | <i>KIAA0319</i> |                          |                                |        |           |        |        |        |
| rs807508            | <i>KIAA0319</i> | 1                        |                                |        |           |        | 0.0188 | 0.021  |

|                          |                 |   |        |        |        |        |
|--------------------------|-----------------|---|--------|--------|--------|--------|
| rs4504469                | <i>KIAA0319</i> | 1 | 0.0337 |        |        |        |
| rs4576240                | <i>KIAA0319</i> |   |        |        |        |        |
| rs4472344                | <i>KIAA0319</i> |   |        |        |        |        |
| rs16889511               | <i>KIAA0319</i> |   |        |        |        |        |
| rs4236032                | <i>KIAA0319</i> | 1 | 0.023  |        | 0.0051 | 0.003  |
| rs9356939                | <i>KIAA0319</i> | 2 | 0.0434 |        |        |        |
| SNP24721800              | <i>KIAA0319</i> | 2 | 0.0464 |        | 0.0459 |        |
| rs9393567                | <i>KIAA0319</i> | 2 | 0.0443 |        |        |        |
| rs16889523               | <i>KIAA0319</i> |   |        |        |        |        |
| rs2745333                | <i>KIAA0319</i> | 1 | 0.014  |        |        |        |
| rs12194307               | <i>KIAA0319</i> |   |        |        |        |        |
| rs2179515                | <i>KIAA0319</i> | 1 | 0.0246 |        |        |        |
| rs730860                 | <i>KIAA0319</i> | 2 | 0.0074 | 0.0042 |        |        |
| rs761101                 | <i>KIAA0319</i> | 1 | 0.0265 |        | 0.0473 |        |
| rs761100                 | <i>KIAA0319</i> |   |        |        |        |        |
| rs7766230                | <i>KIAA0319</i> | 2 | 0.0333 | 0.0138 | 0.0083 | 0.0106 |
| rs6935076                | <i>KIAA0319</i> |   |        |        |        |        |
| rs6456624                | <i>KIAA0319</i> | 1 | 0.0167 |        | 0.0272 |        |
| rs2328846                | <i>KIAA0319</i> | 1 | 0.0257 |        |        |        |
| rs17491230 <sup>4</sup>  | <i>KIAA0319</i> | 2 | 0.0031 | 0.0426 | 0.0213 | 0.0044 |
| rs2038137                | <i>KIAA0319</i> | 1 | 0.035  |        |        |        |
| k_pr_del                 | Intergenic      | 1 | 0.0261 |        |        |        |
| <b>rs3756821</b>         | Intergenic      |   |        |        |        |        |
| rs9467247 <sup>5</sup>   | Intergenic      | 2 | 0.0025 | 0.0044 |        | 0.0084 |
| rs1555090                | Intergenic      | 1 | 0.0198 | 0.0497 | 0.033  |        |
| rs3212236 <sup>5</sup>   | Intergenic      | 2 | 0.0175 | 0.018  |        | 0.0209 |
| <b>rs13206167</b>        | Intergenic      |   |        |        |        |        |
| <b>rs9461045</b>         | Intergenic      | 2 | 0.0046 | 0.0097 |        | 0.0104 |
| <b>rs28501680</b>        | Intergenic      |   |        |        |        |        |
| rs3033236                | <i>TTRAP</i>    | 2 | 0.0251 | 0.0205 |        |        |
| rs3212232                | <i>TTRAP</i>    |   |        |        |        |        |
| rs2143340 <sup>5,6</sup> | <i>TTRAP</i>    | 2 | 0.0367 | 0.0174 |        |        |

<sup>1</sup> Markers new to this study are in bold

<sup>2</sup> 1 = major allele; 2 = minor allele

<sup>3</sup> Only nominally significant marker-trait associations ( $P < 0.05$ ) are shown, and are uncorrected for multiple testing

<sup>4</sup> Equivalent to rs2235676 in Francks et al. [15]

<sup>5</sup> Re-genotyped in this study, resulting in different P-values than previously reported

<sup>6</sup> Risk haplotype-tagging SNP
