# Supplementary material for: A Common Variant Associated with Dyslexia Reduces Expression of the KIAA0319 Gene
Source: PubMed Central journal article supplement (PMC2653637; doi:10.1371/journal.pgen.1000436), 2009-03-27
Supplement: pgen.1000436.s006.pdf [file pgen.1000436.s006.pdf]

Table S4. Marker-trait association P-values in the severe U.K. subset (126 families) – Adapted from Harold et al. [17]

| Marker <sup>1</sup> | Gene            | Risk Allele <sup>2</sup> | P-Value for Trait <sup>3</sup> |        |           |        |        |        |
|---------------------|-----------------|--------------------------|--------------------------------|--------|-----------|--------|--------|--------|
|                     |                 |                          | OC-irreg                       | PD     | OC-choice | READ   | SPELL  | PA     |
| rs1419228           | <i>DCDC2</i>    |                          |                                |        |           |        |        |        |
| rs7762605           | <i>DCDC2</i>    |                          |                                |        |           |        |        |        |
| rs793862            | <i>DCDC2</i>    |                          |                                |        |           |        |        |        |
| rs793834            | <i>DCDC2</i>    |                          |                                |        |           |        |        |        |
| rs807701            | <i>DCDC2</i>    |                          |                                |        |           |        |        |        |
| rs807726            | <i>DCDC2</i>    |                          |                                |        |           |        |        |        |
| rs807724            | <i>DCDC2</i>    |                          |                                |        |           |        |        |        |
| rs10806987          | <i>DCDC2</i>    |                          |                                |        |           |        |        |        |
| DCDC2_deletion      | <i>DCDC2</i>    | 2                        | 0.0298                         |        |           | 0.0428 |        | 0.0478 |
| rs7765678           | <i>DCDC2</i>    |                          |                                |        |           |        |        |        |
| rs793704            | <i>DCDC2</i>    |                          |                                |        |           |        |        |        |
| rs1087266           | <i>DCDC2</i>    |                          |                                |        |           |        |        |        |
| rs2817220           | <i>ALDH5A1</i>  | 1                        | 0.0326                         | 0.0067 |           |        |        | 0.0004 |
| rs2252525           | <i>ALDH5A1</i>  |                          |                                |        |           |        |        |        |
| rs807517            | <i>ALDH5A1</i>  | 1                        |                                | 0.0225 |           |        |        | 0.0017 |
| rs1054899           | <i>ALDH5A1</i>  |                          |                                |        |           |        |        |        |
| rs2760184           | Intergenic      |                          |                                |        |           |        |        |        |
| rs807527            | <i>KIAA0319</i> |                          |                                |        |           |        |        |        |
| rs699463            | <i>KIAA0319</i> | 1                        | 0.0032                         | 0.0231 |           | 0.0279 | 0.0153 | 0.0112 |
| rs807530            | <i>KIAA0319</i> |                          |                                |        |           |        |        |        |
| rs807535            | <i>KIAA0319</i> |                          |                                |        |           |        |        |        |
| rs807540            | <i>KIAA0319</i> | 1                        | 0.0204                         |        |           | 0.0113 | 0.0093 |        |
| rs807545            | <i>KIAA0319</i> | 1                        |                                |        |           |        | 0.0244 |        |
| rs2817191           | <i>KIAA0319</i> |                          |                                |        |           |        |        |        |
| rs807521            | <i>KIAA0319</i> | 1                        |                                |        |           |        | 0.0306 |        |
| rs807525            | <i>KIAA0319</i> |                          |                                |        |           |        |        |        |
| rs807507            | <i>KIAA0319</i> |                          |                                |        |           |        |        |        |
| rs807508            | <i>KIAA0319</i> | 1                        |                                |        |           |        | 0.0304 |        |

|                          |                 |   |        |        |        |        |        |
|--------------------------|-----------------|---|--------|--------|--------|--------|--------|
| rs4504469                | <i>KIAA0319</i> | 1 | 0.0011 | 0.0082 |        | 0.004  | 0.01   |
| rs4576240                | <i>KIAA0319</i> |   |        |        |        |        |        |
| rs4472344                | <i>KIAA0319</i> |   |        |        |        |        |        |
| rs16889511               | <i>KIAA0319</i> |   |        |        |        |        |        |
| rs4236032                | <i>KIAA0319</i> | 1 |        |        |        | 0.0432 | 0.0072 |
| rs9356939                | <i>KIAA0319</i> | 2 | 0.0156 |        |        |        | 0.0486 |
| SNP24721800              | <i>KIAA0319</i> | 2 |        |        |        | 0.0205 |        |
| rs9393567                | <i>KIAA0319</i> |   |        |        |        |        |        |
| rs16889523               | <i>KIAA0319</i> |   |        |        |        |        |        |
| rs2745333                | <i>KIAA0319</i> | 1 | 0.0013 | 0.0073 |        | 0.0028 |        |
| rs12194307               | <i>KIAA0319</i> |   |        |        |        |        |        |
| rs2179515                | <i>KIAA0319</i> | 1 | 0.0012 | 0.0131 |        | 0.0004 | 0.0232 |
| rs730860                 | <i>KIAA0319</i> | 2 | 0.0035 |        | 0.0132 | 0.0104 |        |
| rs761101                 | <i>KIAA0319</i> | 1 | 0.0025 | 0.0057 |        | 0.0006 | 0.0325 |
| rs761100                 | <i>KIAA0319</i> | 1 | 0.0027 | 0.0406 | 0.0107 | 0.0078 | 0.0306 |
| rs7766230                | <i>KIAA0319</i> | 2 | 0.0049 |        | 0.0002 | 0.0017 | 0.0096 |
| rs6935076                | <i>KIAA0319</i> |   |        |        |        |        |        |
| rs6456624                | <i>KIAA0319</i> | 1 | 0.0005 | 0.0045 |        | 0.0003 | 0.0157 |
| rs2328846                | <i>KIAA0319</i> | 1 | 0.0007 | 0.0017 |        | 0.0003 | 0.0155 |
| rs17491230 <sup>4</sup>  | <i>KIAA0319</i> | 2 | 0.0023 |        | 0.0009 | 0.0041 |        |
| rs2038137                | <i>KIAA0319</i> | 1 | 0.0013 | 0.0026 |        | 0.0002 | 0.0061 |
| k_pr_del                 | Intergenic      | 1 | 0.0011 | 0.0032 |        | 0.0002 | 0.0086 |
| <b>rs3756821</b>         | Intergenic      | 2 |        | 0.0401 |        |        |        |
| rs9467247 <sup>5</sup>   | Intergenic      | 2 | 0.0003 | 0.0362 | 0.0001 | 0.0002 | 0.002  |
| rs1555090                | Intergenic      | 1 | 0.001  | 0.0029 |        | 0.0003 | 0.0131 |
| rs3212236 <sup>5</sup>   | Intergenic      | 2 | 0.0013 |        | 0.0006 | 0.0008 | 0.0024 |
| <b>rs13206167</b>        | Intergenic      |   |        |        |        |        |        |
| <b>rs9461045</b>         | Intergenic      | 2 | 0.0006 | 0.0489 | 0.0003 | 0.0003 | 0.0018 |
| <b>rs28501680</b>        | Intergenic      |   |        |        |        |        |        |
| rs3033236                | <i>TTRAP</i>    | 2 | 0.0134 |        | 0.0104 | 0.0073 |        |
| rs3212232                | <i>TTRAP</i>    |   |        |        |        |        |        |
| rs2143340 <sup>5,6</sup> | <i>TTRAP</i>    | 2 | 0.0063 |        | 0.0007 | 0.0016 | 0.0136 |

<sup>1</sup> Markers new to this study are in bold

<sup>2</sup> 1 = major allele; 2 = minor allele

<sup>3</sup> Only nominally significant marker-trait associations ( $P < 0.05$ ) are shown, and are uncorrected for multiple testing

<sup>4</sup> Equivalent to rs2235676 in Francks et al. [15]

<sup>5</sup> Re-genotyped in this study, resulting in different P-values than previously reported

<sup>6</sup> Risk haplotype-tagging SNP
