# Supplementary material for: A Common Variant Associated with Dyslexia Reduces Expression of the KIAA0319 Gene
Source: PubMed Central journal article supplement (PMC2653637; doi:10.1371/journal.pgen.1000436), 2009-03-27
Supplement: pgen.1000436.s007.pdf [file pgen.1000436.s007.pdf]

## Text S1. Supplementary methods

### **BAC recombineering**

The primers below were used to amplify pGL3-Basic and add homology arms to both ends of the resulting PCR product. The 55-bp homologous region specific for the beginning or end of the targeted BAC sequence is in italics, and the sequence recognizing pGL3-Basic vector is underlined:

Beginning of *KIAA0319* upstream segment:

5'-*TAGGTGTTTAAATTTTGGCACTCCTGATATAAATAAGATTCTATTACTTCTAATTC*  
GATAGAGAAATGTTCTGGCACCT-3'

End of *KIAA0319* upstream segment:

5'-*GATCCCCCGGGGTGCAACCTTGCTCCACCTGTGCTGCCCTCGGCGGGCCTG*  
GCTCGAGCTCTTACGCGTGCTA-3'.

### **Site-directed mutagenesis**

The reverse primer for each oligonucleotide is the reverse complement of the forward oligonucleotide (unless otherwise included), and the mutant allele is underlined:

SNP 2\_risk:

5'-aaaaaaccacttttaAtctgctttcatgagc-3'

SNP 4\_risk:

5'-attatactaaggatacatcattttatccttGctacctctgcagtgctggc-3'

5'-aaggataaaatgatgtatccttagtataattaactttgtctgct-3'

SNP 5\_risk:

5'-tgtctaaggctcttcTgtaaatacagtagc-3'

ETF\_mutant:

5'-ccgtgtaaccgcggAggcggaaaggcgtg-3'

RFX\_mutant:

5'-cgtgcgcgcgctcgAgtgtaaccgcggcg-3'

## Electrophoretic mobility shift assays

The following primers together with their reverse complements (not shown) were used to create double-stranded probe and competitor DNAs (with the exception of those purchased from Promega, which were already in double-stranded form):

SNP 2 non-risk: 5'-accacttttaGtctgctttca-3'

SNP 2 risk: 5'-accacttttaAtctgctttca-3'

SNP 4 non-risk: 5'-ttttatccttActacctcttg-3'

SNP 4 risk: 5'-ttttatccttGctacctcttg-3'

SNP 5 non-risk: 5'-aaggctcttcGgtaaatacgag-3'

SNP 5 risk: 5'-aaggctcttcTgtaaatacgag-3'

AP2: 5'-GATCGAACTGACCGCCCGGGCCCGT-3' (Promega)

OCT-1: 5'-TGTCGAATGCAAATCACTAGAA-3' (Promega)

CRX: 5'-GGGGCGTTATTAATCATATTAATCCTCAC-3'

(CRX-binding site from the BAT-1 promoter [49])
