# Supplementary material for: A Common Variant Associated with Dyslexia Reduces Expression of the KIAA0319 Gene
Source: PLoS Genet. 2009 Mar 27;5(3):e1000436. doi: 10.1371/journal.pgen.1000436 (PMC2653637; doi:10.1371/journal.pgen.1000436)
Supplement: Table S2 — Genotype statistics for KIAA0319 promoter region SNPs. (0.04 MB PDF) [file pgen.1000436.s004.pdf]

Table S2. Genotype statistics for *KIAA0319* promoter region SNPs

| Marker      | SNP | Sample 1<br>89 families |                  | Entire U.K. set<br>264 families |      | Severe U.K. subset<br>126 families |      |
|-------------|-----|-------------------------|------------------|---------------------------------|------|------------------------------------|------|
|             |     | MAF <sup>a</sup>        | GSR <sup>b</sup> | MAF                             | GSR  | MAF                                | GSR  |
| rs2143340   | *   | 0.16                    | 98.3             | 0.14                            | 90.8 | 0.12                               | 90.3 |
| rs28501680  | 1   | 0.005                   | 96.8             | 0.002                           | 97.8 | 0                                  | 97.7 |
| rs9461045   | 2   | 0.19                    | 95.8             | 0.17                            | 97.3 | 0.15                               | 97.2 |
| rs13206167  | 3   | 0.36                    | 78.1             | 0.40                            | 84.4 | 0.42                               | 83.4 |
| rs3212236   | 4   | 0.20                    | 82.6             | 0.17                            | 91.2 | 0.14                               | 93.1 |
| rs9467247   | 5   | 0.19                    | 97.0             | 0.17                            | 97.9 | 0.15                               | 98.1 |
| rs3756821   | 6   | 0.39                    | 94.8             | 0.40                            | 89.4 | 0.42                               | 88.5 |
| SNP24754493 | 7   | 0.14                    | 91.5             | N/A                             | N/A  | N/A                                | N/A  |

<sup>a</sup>Minor allele frequency

<sup>b</sup>Genotype success rate (%)

\*Risk haplotype-tagging SNP
